# Supplementary material for: Alternative oxidase‐mediated respiration prevents lethal mitochondrial cardiomyopathy
Source: PubMed Central journal article supplement (PMC6328925; doi:10.15252/emmm.201809456), 2018-12-10
Supplement: EMMM-11-e9456-s001.pdf [file EMMM-11-e9456-s001.pdf]

# **Rajendran et al. Alternative oxidase-mediated respiration prevents lethal mitochondrial cardiomyopathy**

## **Appendix material**

### **Table of Contents**

|                                                                                                                                         |    |
|-----------------------------------------------------------------------------------------------------------------------------------------|----|
| Appendix Figure S1. Kidney manifestations in GRAC and GROX mice at P200.....                                                            | 2  |
| Appendix Figure S2. Transcriptomic changes related to oxidative metabolism at P150. ....                                                | 3  |
| Appendix Table S1. Pathway enrichment analysis of the transcriptomics data (FC>1.5 and $p<0.05$ )<br>from heart, kidney and liver. .... | 4  |
| Appendix Table S2. Absolute concentrations ( $\mu\text{M}$ ) of metabolites in heart and liver tissue at P150. ....                     | 7  |
| Appendix Table S3. List of primary and secondary antibodies used in this study. ....                                                    | 10 |

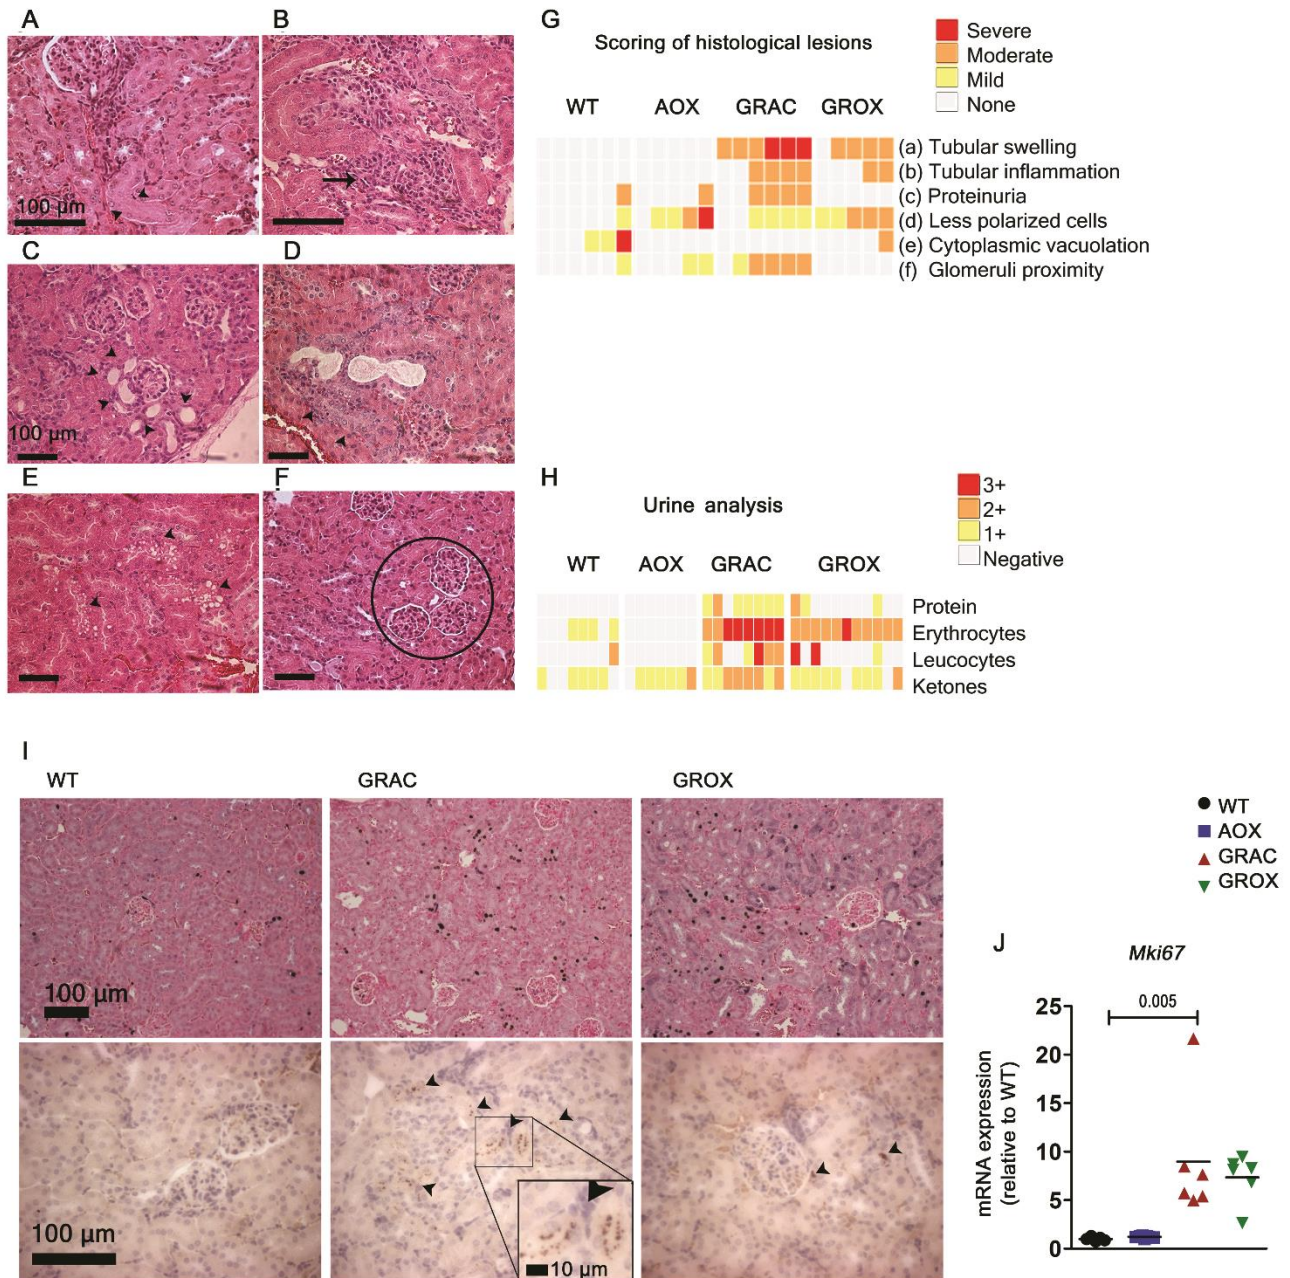

### Appendix Figure S1. Kidney manifestations in GRAC and GROX mice at P200.

**A-F.** Distinct histological signs of tubular deterioration included (A) enlarged tubuli with diffuse nuclei (arrow heads), (B) inflammation (arrow), (C) proteinuria (arrow heads), (D) degenerating tubular cells (grey cells, arrow heads), (E) cytoplasmic vacuoles (arrow heads), and (F) glomerular proximity due to cortical atrophy (circled). Scale bar 100  $\mu$ m.

**G.** Quantification of the histological findings.

**H.** Urine analysis.

**I.** Immunostaining for Ki-67 (proliferating cell marker) and caspase-3 (Apoptotic marker).

**J.** mRNA expression of *Ki-67* (*Mki67*) (One-way ANOVA with Tukey's test).

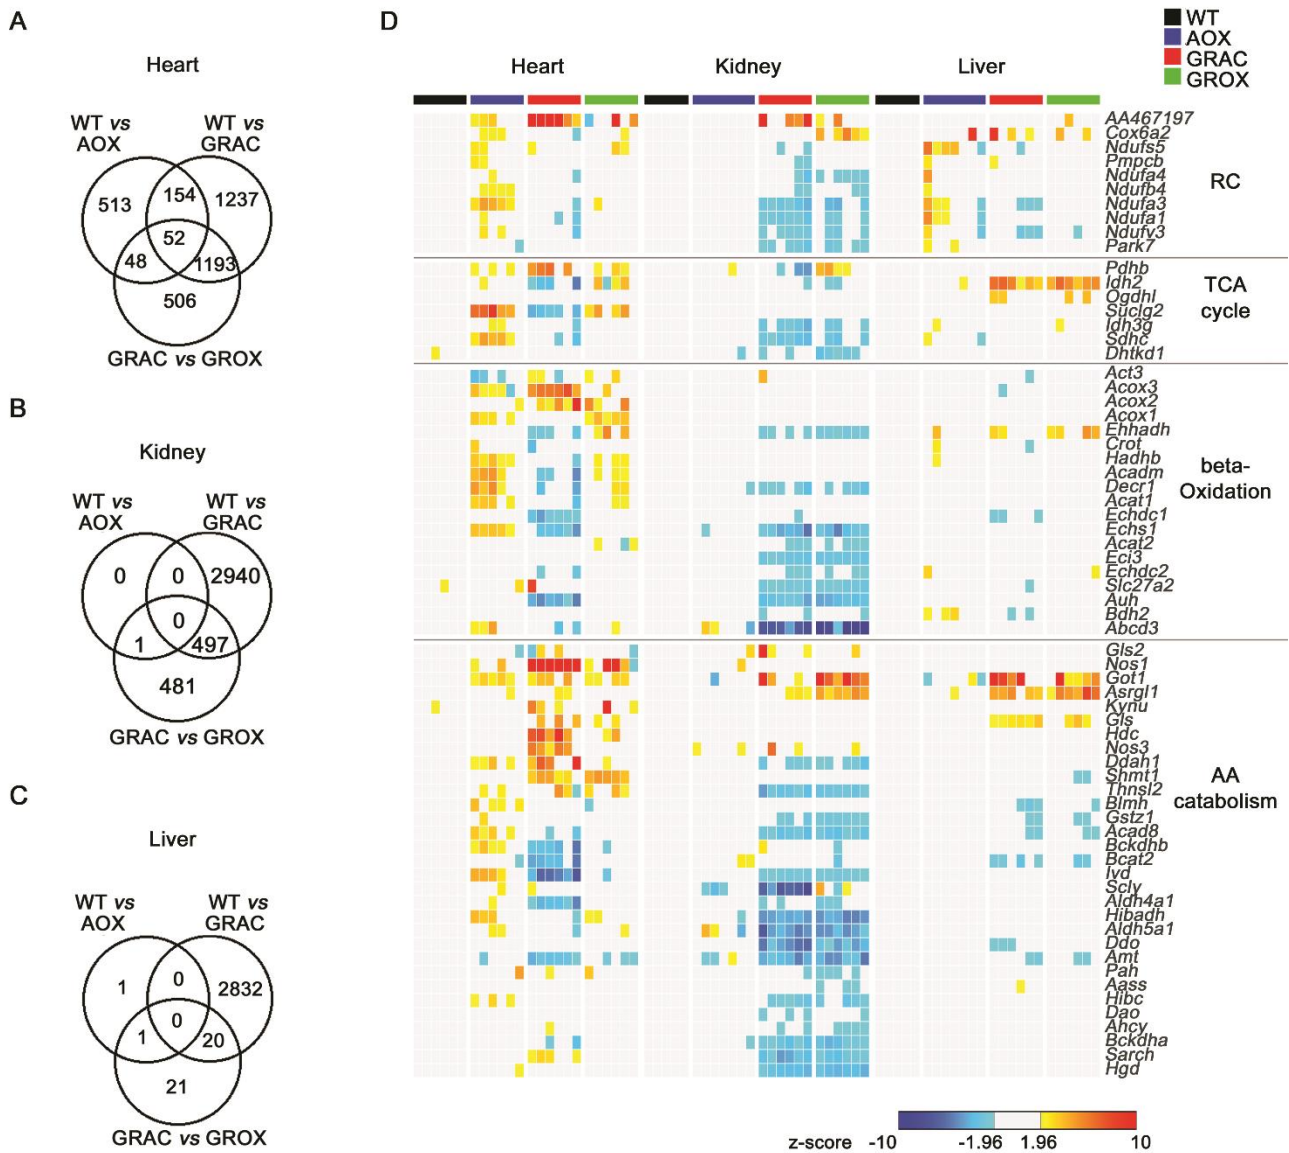

**Appendix Figure S2. Transcriptomic changes related to oxidative metabolism at P150.**

**A-C.** Venn diagrams showing the number of genes with significantly changed expression in the three comparisons (1: WT vs AOX, 2: WT vs GRAC, and 3: GRAC vs GROX) and their overlap in heart, kidney and liver.

**D.** AOX upregulated genes related to oxidative metabolism including RC, TCA cycle, beta-oxidation and amino acid (AA) catabolism in heart but not in liver or kidney. Heat map was generated from the z score values (WT as a reference population).

**Appendix Table S1. Pathway enrichment analysis of the transcriptomics data (FC>1.5 and  $p<0.05$ ) from heart, kidney and liver.**

| Tissue | Reactome ID   | Pathway                                                  | WT vs GRAC comparison |         |            | GRAC vs GROX comparison |         |            |
|--------|---------------|----------------------------------------------------------|-----------------------|---------|------------|-------------------------|---------|------------|
|        |               |                                                          | Matches               | p value | Regulation | Matches                 | p value | Regulation |
| Heart  | R-MMU-1474244 | Extracellular matrix organization                        | 65                    | 2.0E-18 | Up         | 74                      | 1.5E-29 | Down       |
| Heart  | R-MMU-1474290 | Collagen formation                                       | 26                    | 9.6E-11 | Up         | 32                      | 9.4E-19 | Down       |
| Heart  | R-MMU-216083  | Integrin cell surface interactions                       | 25                    | 2.8E-09 | Up         | 29                      | 5.0E-15 | Down       |
| Heart  | R-MMU-9006934 | Signaling by Receptor Tyrosine Kinases                   | 57                    | 1.9E-05 | Up         | 65                      | 1.6E-11 | Down       |
| Heart  | R-MMU-186797  | Signaling by PDGF                                        | 15                    | 1.1E-04 | Up         | 20                      | 6.5E-10 | Down       |
| Heart  | R-MMU-1566948 | Elastic fibre formation                                  | 15                    | 2.2E-07 | Up         | 16                      | 1.7E-09 | Down       |
| Heart  | R-MMU-419037  | NCAM1 interactions                                       | 8                     | 6.5E-04 | Up         | 12                      | 2.6E-09 | Down       |
| Heart  | R-MMU-3000157 | Laminin interactions                                     | 9                     | 2.2E-03 | Up         | 13                      | 6.4E-08 | Down       |
| Heart  | R-MMU-109582  | Hemostasis                                               | 74                    | 3.3E-09 | Up         | 60                      | 1.4E-06 | Down       |
| Heart  | R-MMU-2214320 | Anchoring fibril formation                               | 6                     | 1.2E-02 | Up         | 8                       | 2.4E-05 | Down       |
| Heart  | R-MMU-76002   | Platelet activation, signaling and aggregation           | 42                    | 1.7E-06 | Up         | 34                      | 9.6E-05 | Down       |
| Heart  | R-MMU-8875878 | MET promotes cell motility                               | 12                    | 3.2E-04 | Up         | 11                      | 3.8E-04 | Down       |
| Heart  | R-MMU-114608  | Platelet degranulation                                   | 24                    | 1.8E-04 | Up         | 20                      | 1.6E-03 | Down       |
| Heart  | R-MMU-76005   | Response to elevated platelet cytosolic Ca <sup>2+</sup> | 24                    | 3.0E-04 | Up         | 20                      | 2.6E-03 | Down       |
| Heart  | R-MMU-202733  | Cell surface interactions at the vascular wall           | 22                    | 6.5E-04 | Up         | -                       | -       | -          |
| Heart  | R-MMU-1430728 | Metabolism                                               | 99                    | 1.2E-02 | Down       | 94                      | 4.2E-13 | Up         |
| Heart  | R-MMU-70895   | Branched-chain amino acid catabolism                     | 7                     | 1.3E-02 | Down       | 6                       | 7.3E-03 | Up         |
| Heart  | R-MMU-71291   | Metabolism of amino acids and derivatives                | -                     | -       | -          | 18                      | 1.0E-02 | Up         |
| Heart  | R-MMU-375165  | NCAM signaling for neurite out-growth                    | -                     | -       | -          | 12                      | 2.4E-05 | Down       |
| Heart  | R-MMU-422475  | Axon guidance                                            | -                     | -       | -          | 35                      | 3.5E-05 | Down       |

| Tissue | Reactome ID   | Pathway                                             | WT vs GRAC comparison |         |            | GRAC vs GROX comparison |         |            |
|--------|---------------|-----------------------------------------------------|-----------------------|---------|------------|-------------------------|---------|------------|
|        |               |                                                     | Matches               | p value | Regulation | Matches                 | p value | Regulation |
| Kidney | R-MMU-1640170 | Cell Cycle                                          | 97                    | 4.7E-18 | Up         | -                       | -       | -          |
| Kidney | R-MMU-194315  | Signaling by Rho GTPases                            | 56                    | 2.3E-07 | Up         | -                       | -       | -          |
| Kidney | R-MMU-68886   | M Phase                                             | 51                    | 7.2E-07 | Up         | -                       | -       | -          |
| Kidney | R-MMU-6791312 | TP53 Regulates Transcription of Cell Cycle Genes    | 13                    | 2.4E-05 | Up         | -                       | -       | -          |
| Kidney | R-MMU-2555396 | Mitotic Metaphase and Anaphase                      | 33                    | 3.0E-05 | Up         | -                       | -       | -          |
| Kidney | R-MMU-176187  | Activation of ATR in response to replication stress | 13                    | 9.2E-05 | Up         | -                       | -       | -          |
| Kidney | R-MMU-73886   | Chromosome Maintenance                              | 15                    | 2.6E-04 | Up         | -                       | -       | -          |
| Kidney | R-MMU-1430728 | Metabolism                                          | 305                   | 3.6E-59 | Down       | 84                      | 1.4E-04 | Down       |
| Kidney | R-MMU-196854  | Metabolism of vitamins and cofactors                | 47                    | 2.7E-13 | Down       | -                       | -       | -          |
| Kidney | R-MMU-71291   | Metabolism of amino acids and derivatives           | 55                    | 6.7E-13 | Down       | -                       | -       | -          |
| Kidney | R-MMU-556833  | Metabolism of lipids                                | 98                    | 3.7E-12 | Down       | -                       | -       | -          |
| Kidney | R-MMU-211859  | Biological oxidations                               | 50                    | 2.1E-10 | Down       | -                       | -       | -          |
| Kidney | R-MMU-70895   | Branched-chain amino acid catabolism                | 13                    | 1.7E-07 | Down       | -                       | -       | -          |
| Kidney | R-MMU-8957322 | Metabolism of steroids                              | 30                    | 7.9E-07 | Down       | -                       | -       | -          |
| Kidney | R-MMU-390918  | Peroxisomal lipid metabolism                        | 14                    | 8.1E-07 | Down       | -                       | -       | -          |
| Kidney | R-MMU-156580  | Phase II - Conjugation of compounds                 | 20                    | 7.9E-05 | Down       | -                       | -       | -          |
| Kidney | R-MMU-211945  | Phase I - Functionalization of compounds            | 27                    | 6.0E-04 | Down       | -                       | -       | -          |
| Kidney | R-MMU-5419276 | Mitochondrial translation termination               | 19                    | 7.4E-04 | Down       | -                       | -       | -          |
| Kidney | R-MMU-5368287 | Mitochondrial translation                           | 19                    | 8.4E-04 | Down       | -                       | -       | -          |
| Kidney | R-MMU-8963888 | Chylomicron assembly                                | 6                     | 9.5E-04 | Down       | -                       | -       | -          |
| Kidney | R-MMU-174403  | Glutathione synthesis and recycling                 | 6                     | 9.5E-04 | Down       | -                       | -       | -          |

| Tissue | Reactome ID   | Pathway                                                                                                                     | WT vs GRAC comparison |         |            | GRAC vs GROX comparison |         |            |
|--------|---------------|-----------------------------------------------------------------------------------------------------------------------------|-----------------------|---------|------------|-------------------------|---------|------------|
|        |               |                                                                                                                             | Matches               | p value | Regulation | Matches                 | p value | Regulation |
| Liver  | R-MMU-1640170 | Cell Cycle                                                                                                                  | 110                   | 2.7E-17 | Up         | -                       | -       | -          |
| Liver  | R-MMU-1474244 | Extracellular matrix organization                                                                                           | 69                    | 1.1E-12 | Up         | -                       | -       | -          |
| Liver  | R-MMU-194315  | Signaling by Rho GTPases                                                                                                    | 73                    | 9.4E-11 | Up         | -                       | -       | -          |
| Liver  | R-MMU-2022090 | Assembly of collagen fibrils and other multimeric structures                                                                | 21                    | 4.2E-09 | Up         | -                       | -       | -          |
| Liver  | R-MMU-3000157 | Laminin interactions                                                                                                        | 16                    | 2.5E-08 | Up         | -                       | -       | -          |
| Liver  | R-MMU-216083  | Integrin cell surface interactions                                                                                          | 25                    | 1.3E-06 | Up         | -                       | -       | -          |
| Liver  | R-MMU-419037  | NCAM1 interactions                                                                                                          | 11                    | 8.9E-06 | Up         | -                       | -       | -          |
| Liver  | R-MMU-186797  | Signaling by PDGF                                                                                                           | 18                    | 6.6E-05 | Up         | -                       | -       | -          |
| Liver  | R-MMU-176187  | Activation of ATR in response to replication stress                                                                         | 14                    | 9.4E-05 | Up         | -                       | -       | -          |
| Liver  | R-MMU-9006934 | Signaling by Receptor Tyrosine Kinases                                                                                      | 68                    | 4.9E-04 | Up         | -                       | -       | -          |
| Liver  | R-MMU-1430728 | Metabolism                                                                                                                  | 188                   | 9.2E-26 | Down       | -                       | -       | -          |
| Liver  | R-MMU-556833  | Metabolism of lipids                                                                                                        | 75                    | 1.2E-10 | Down       | -                       | -       | -          |
| Liver  | R-MMU-8957322 | Metabolism of steroids                                                                                                      | 25                    | 1.2E-06 | Down       | -                       | -       | -          |
| Liver  | R-MMU-211859  | Biological oxidations                                                                                                       | 35                    | 1.5E-06 | Down       | -                       | -       | -          |
| Liver  | R-MMU-166658  | Complement cascade                                                                                                          | 18                    | 1.8E-06 | Down       | -                       | -       | -          |
| Liver  | R-MMU-174824  | Plasma lipoprotein assembly, remodeling, and clearance                                                                      | 16                    | 9.8E-06 | Down       | -                       | -       | -          |
| Liver  | R-MMU-211945  | Phase I - Functionalization of compounds                                                                                    | 25                    | 1.4E-05 | Down       | -                       | -       | -          |
| Liver  | R-MMU-71291   | Metabolism of amino acids and derivatives                                                                                   | 32                    | 3.3E-05 | Down       | -                       | -       | -          |
| Liver  | R-MMU-381426  | Regulation of Insulin-like Growth Factor (IGF) transport and uptake by Insulin-like Growth Factor Binding Proteins (IGFBPs) | 23                    | 9.5E-05 | Down       | -                       | -       | -          |
| Liver  | R-MMU-196854  | Metabolism of vitamins and cofactors                                                                                        | 24                    | 5.0E-04 | Down       | -                       | -       | -          |

Selected pathways from pathway enrichment analysis of transcriptomics data from heart, kidney and liver at P150. Upregulated and downregulated genes ( $|FC| > 1.5$  and  $p < 0.05$ ) were analyzed separately. Benjamin-Hochberg correction was applied to  $p$  values.

**Appendix Table S2. Absolute concentrations ( $\mu\text{M}$ ) of metabolites in heart and liver tissue at P150.**

| Metabolites                | Heart  |       |        |       |        |       | Liver  |       |        |       |        |       |
|----------------------------|--------|-------|--------|-------|--------|-------|--------|-------|--------|-------|--------|-------|
|                            | WT     |       | GRAC   |       | GROX   |       | WT     |       | GRAC   |       | GROX   |       |
|                            | Mean   | SD    | Mean   | SD    | Mean   | SD    | Mean   | SD    | Mean   | SD    | Mean   | SD    |
| 2,3-Diphosphoglyceric acid | 211.6  | 106.8 | 78.8   | 23.8  | 145.5  | 64.9  | 23.7   | 7.0   | 30.9   | 22.4  | 17.7   | 8.7   |
| 2-Hydroxyglutaric acid     | 20.0   | 5.4   | 45.6   | 25.3  | 17.6   | 1.6   | 19.3   | 4.1   | 17.3   | 2.0   | 12.3   | 5.7   |
| 2-Oxoglutaric acid         | NA     | NA    | NA     | NA    | NA     | NA    | NA     | NA    | NA     | NA    | NA     | NA    |
| 2-Oxoisovaleric acid       | NA     | NA    | NA     | NA    | NA     | NA    | NA     | NA    | NA     | NA    | NA     | NA    |
| 2-Phosphoglyceric acid     | 2.6    | 0.6   | 1.4    | 0.4   | 2.2    | 0.6   | 0.8    | 0.2   | 0.7    | 0.3   | 0.9    | 0.5   |
| 3-Phosphoglyceric acid     | 28.1   | 3.9   | 15.9   | 4.3   | 22.7   | 5.7   | 8.9    | 2.0   | 8.4    | 3.6   | 8.4    | 3.6   |
| 6-Phosphogluconic acid     | 5.8    | 0.5   | 5.8    | 0.6   | 6.0    | 0.6   | 43.3   | 11.4  | 22.7   | 10.6  | 33.2   | 5.3   |
| Acetoacetyl CoA            | NA     | NA    | 0.1    | NA    | 0.1    | NA    | 3.7    | 2.4   | 2.0    | 1.3   | 2.5    | 1.7   |
| Acetyl CoA                 | 14.3   | 5.5   | 13.5   | 4.0   | 15.5   | 3.8   | 4.7    | 1.2   | 1.2    | 0.5   | 1.9    | 0.9   |
| Adenine                    | 6.2    | 3.4   | 3.7    | 4.6   | 7.7    | 4.9   | 2.3    | 0.8   | 3.2    | 1.3   | 2.8    | 1.3   |
| Adenosine                  | 136.1  | 98.7  | 117.6  | 171.6 | 207.5  | 172.0 | 163.5  | 17.5  | 154.3  | 26.1  | 108.3  | 19.5  |
| Adenylosuccinic acid       | 12.0   | 7.4   | 8.2    | 3.3   | 9.3    | 7.4   | 8.2    | 5.7   | 41.4   | 15.2  | 16.1   | 10.4  |
| ADP                        | 1322.8 | 312.2 | 986.2  | 296.6 | 1291.8 | 198.7 | 588.9  | 220.0 | 744.4  | 209.6 | 787.4  | 161.7 |
| ADP-ribose                 | 50.0   | 18.2  | 42.3   | 13.9  | 32.5   | 14.5  | 193.9  | 38.2  | 135.8  | 44.5  | 166.0  | 32.7  |
|                            |        |       |        |       |        |       |        | 1656. |        | 1109. |        | 2126. |
| Ala                        | 3086.7 | 527.0 | 3576.7 | 702.0 | 3148.7 | 290.6 | 3945.1 | 8     | 3322.4 | 5     | 5012.9 | 9     |
| AMP                        | 1093.3 | 470.1 | 841.5  | 373.8 | 859.9  | 306.2 | 1671.4 | 134.1 | 1680.1 | 289.7 | 1670.7 | 215.4 |
| Arg                        | 169.3  | 11.8  | 166.3  | 45.3  | 168.1  | 27.8  | 5.3    | 0.1   | 7.6    | 3.5   | 10.9   | 4.4   |
| Argininosuccinic acid      | 6.8    | 1.4   | 8.1    | 2.8   | 7.3    | 2.5   | 6.1    | 2.1   | 11.2   | 3.7   | 11.7   | 4.6   |
| Asn                        | 127.8  | 20.4  | 159.0  | 104.2 | 233.0  | 24.9  | 132.9  | 17.2  | 141.3  | 30.2  | 156.1  | 38.5  |
| Asp                        | 1178.9 | 366.6 | 667.1  | 286.1 | 1173.2 | 245.1 | 467.1  | 117.5 | 716.0  | 264.9 | 648.4  | 199.9 |
| ATP                        | 1503.7 | 443.8 | 1297.2 | 768.3 | 1701.0 | 172.3 | 187.1  | 158.9 | 234.3  | 108.0 | 334.4  | 154.4 |
| Betaine                    | NA     | NA    | 34.4   | 25.9  | 56.3   | 34.0  | 850.3  | 383.6 | 1721.4 | 662.9 | 1916.7 | 335.4 |
| Betaine aldehyde           | NA     | NA    | NA     | NA    | NA     | NA    | 1.7    | 0.8   | 4.8    | 1.3   | 8.0    | 5.0   |
| cAMP                       | 0.6    | 0.1   | 0.7    | 0.2   | 0.7    | 0.2   | 0.5    | 0.1   | 1.2    | 0.7   | 1.2    | 0.7   |
| Carbamoylphosphate         | NA     | NA    | NA     | NA    | NA     | NA    | NA     | NA    | NA     | NA    | NA     | NA    |
| Carnitine                  | 311.3  | 80.4  | 257.7  | 110.7 | 438.4  | 73.8  | 190.1  | 52.8  | 169.1  | 66.9  | 203.1  | 46.1  |
| Carnosine                  | 17.1   | 13.9  | 150.6  | 79.7  | 22.7   | 12.2  | 1.7    | 0.4   | 1.8    | 1.0   | 1.3    | 0.2   |
| cGMP                       | 0.0    | 0.0   | 0.0    | 0.0   | 0.0    | 0.0   | 0.0    | NA    | 0.0    | NA    | NA     | NA    |
| Choline                    | 87.8   | 17.8  | 48.8   | 32.3  | 52.6   | 26.3  | 117.1  | 16.8  | 79.7   | 51.7  | 104.0  | 27.9  |
| cis-Aconitic acid          | 4.1    | 1.4   | 10.3   | 4.8   | 5.1    | 2.3   | 1.1    | 0.3   | 6.6    | 4.2   | 2.4    | 1.4   |
| Citric acid                | 287.2  | 43.1  | 429.2  | 178.1 | 314.6  | 115.2 | 49.2   | 9.3   | 219.6  | 117.3 | 90.6   | 34.3  |
| Citrulline                 | 175.1  | 20.6  | 241.9  | 67.2  | 126.8  | 28.4  | 30.4   | 22.0  | 40.8   | 5.7   | 34.3   | 23.9  |
| CoA                        | 29.5   | 9.3   | 29.7   | 6.3   | 34.8   | 14.3  | 60.0   | 7.8   | 47.2   | 9.2   | 59.1   | 14.6  |
|                            |        | 1921. | 10347. |       | 10580. | 1327. |        |       |        |       |        |       |
| Creatine                   | 9826.1 | 4     | 9      | 186.6 | 1      | 8     | 217.7  | 55.1  | 348.5  | 148.9 | 298.8  | 50.4  |
| Creatinine                 | 9.0    | 1.2   | 10.3   | 0.7   | 9.0    | 2.2   | 6.3    | 0.9   | 6.8    | 1.5   | 4.9    | 1.5   |
| Cys                        | NA     | NA    | NA     | NA    | NA     | NA    | 18.6   | 12.4  | 5.6    | 3.5   | 14.1   | 6.9   |
| Cystathionine              | NA     | NA    | NA     | NA    | 0.4    | NA    | 13.3   | 8.1   | 12.2   | 2.9   | 28.3   | 10.2  |
| Dihydroxyacetone phosphate | 186.4  | 48.1  | 139.0  | 67.3  | 178.0  | 39.9  | 62.4   | 18.0  | 43.3   | 13.5  | 103.2  | 28.3  |
| Erythrose 4-phosphate      | NA     | NA    | NA     | NA    | NA     | NA    | NA     | NA    | NA     | NA    | NA     | NA    |
| Folic acid                 | NA     | NA    | NA     | NA    | NA     | NA    | 0.0    | 0.0   | 0.0    | 0.0   | 0.0    | 0.0   |
| Fructose 1,6-diphosphate   | 106.1  | 49.3  | 123.4  | 72.7  | 127.1  | 87.3  | 5.8    | 1.3   | 6.7    | 2.9   | 22.3   | 8.1   |
| Fructose 1-phosphate       | 4.1    | 2.6   | 5.3    | 4.5   | 9.1    | 7.4   | 16.9   | 8.0   | 6.5    | 2.7   | 22.3   | 11.6  |
| Fructose 6-phosphate       | 69.2   | 14.9  | 57.9   | 27.6  | 94.0   | 28.0  | 77.6   | 26.5  | 22.6   | 16.4  | 51.6   | 22.1  |
| Fumaric acid               | 291.9  | 64.4  | 274.7  | 101.8 | 329.5  | 194.8 | 85.1   | 46.7  | 440.6  | 229.6 | 262.5  | 143.4 |
| Galactose 1-phosphate      | 7.2    | 1.2   | 5.7    | 1.4   | 8.1    | 1.5   | 39.7   | 23.8  | 7.3    | 3.8   | 15.8   | 5.1   |

|                            |        |       |        |       |        |       |        |       |        |       |        |       |
|----------------------------|--------|-------|--------|-------|--------|-------|--------|-------|--------|-------|--------|-------|
| GDP                        | 47.7   | 8.4   | 31.0   | 8.0   | 40.4   | 9.9   | 27.6   | 14.1  | 21.2   | 5.1   | 28.8   | 10.7  |
|                            |        |       |        |       |        |       |        |       |        | 1042. |        |       |
| Gln                        | 6121.1 | 800.7 | 6283.1 | 534.2 | 4336.3 | 827.6 | 3811.9 | 545.4 | 3020.7 | 6     | 2958.2 | 378.0 |
|                            |        | 1165. |        |       |        |       |        |       |        |       |        |       |
| Glu                        | 4110.9 | 9     | 1893.7 | 586.0 | 4338.2 | 854.0 | 1115.1 | 113.6 | 2639.1 | 557.6 | 1658.1 | 196.4 |
| Glucose 1-phosphate        | 12.8   | 3.0   | 14.1   | 3.3   | 18.0   | 6.1   | 19.6   | 9.5   | 4.2    | 2.7   | 9.3    | 4.5   |
| Glucose 6-phosphate        | 223.8  | 49.5  | 193.0  | 78.1  | 315.4  | 98.4  | 278.1  | 106.7 | 86.8   | 65.1  | 185.9  | 80.1  |
|                            |        |       |        |       |        |       |        | 1672. |        | 1147. |        | 1036. |
| Glutathione (GSH)          | 137.0  | 25.9  | 70.8   | 45.4  | 254.2  | 133.4 | 3006.2 | 1     | 1582.8 | 1     | 3660.7 | 0     |
| Glutathione (GSSG)         | 491.3  | 40.4  | 452.2  | 69.2  | 532.1  | 48.4  | 1875.3 | 354.0 | 2395.2 | 150.1 | 2432.0 | 695.8 |
| Gly                        | 511.1  | 47.1  | 637.4  | 154.8 | 879.8  | 77.2  | 1345.5 | 168.8 | 2286.1 | 471.2 | 1711.8 | 387.1 |
| Glyceraldehyde 3-phosphate | 3.2    | 2.1   | 3.6    | 1.3   | 7.3    | 7.5   | 2.6    | 2.0   | 2.5    | 1.4   | 7.8    | 3.6   |
| Glycerol 3-phosphate       | 988.2  | 164.5 | 985.7  | 317.3 | 867.3  | 241.8 | 3243.0 | 365.9 | 1912.2 | 482.9 | 2505.7 | 498.0 |
| Glycolic acid              | 10.7   | 6.1   | 2.4    | NA    | 6.7    | NA    | 26.0   | NA    | 2.0    | NA    | 3.0    | 2.9   |
| Glyoxylate                 | NA     | NA    | NA     | NA    | NA     | NA    | NA     | NA    | NA     | NA    | NA     | NA    |
| GMP                        | 38.4   | 13.3  | 27.1   | 10.6  | 34.8   | 6.5   | 300.9  | 39.6  | 270.1  | 41.8  | 267.1  | 36.4  |
| GTP                        | 67.6   | 13.4  | 56.1   | 28.6  | 73.5   | 16.4  | 17.1   | 13.6  | 13.7   | 4.2   | 22.6   | 9.1   |
| Guanine                    | NA     | NA    | NA     | NA    | NA     | NA    | NA     | NA    | NA     | NA    | NA     | NA    |
| Guanosine                  | 3.6    | 2.0   | 4.9    | 7.3   | 5.6    | 4.9   | 43.0   | 4.8   | 32.8   | 7.7   | 28.0   | 6.6   |
| His                        | 176.7  | 52.1  | 214.1  | 15.8  | 157.9  | 34.3  | 439.0  | 28.1  | 583.4  | 130.0 | 620.1  | 86.9  |
| HMG CoA                    | 0.5    | 0.0   | 0.5    | 0.0   | 0.5    | 0.1   | 0.5    | 0.0   | 0.5    | 0.1   | 0.4    | NA    |
| Homocysteine               | NA     | NA    | NA     | NA    | NA     | NA    | NA     | NA    | NA     | NA    | NA     | NA    |
| Homoserine                 | 2.8    | NA    | 1.4    | 0.3   | 1.5    | 0.4   | 2.2    | 0.9   | 2.0    | 0.7   | 3.2    | 0.8   |
| Hydroxyproline             | 19.8   | 12.7  | 25.7   | 18.1  | 22.1   | 4.8   | 21.8   | 8.0   | 24.5   | 11.4  | 18.4   | 4.4   |
| Hypoxanthine               | 44.7   | 31.8  | 41.6   | 74.2  | 36.7   | 26.1  | 32.4   | 19.3  | 73.1   | 89.6  | 46.1   | 26.7  |
| Ile                        | 59.2   | 3.5   | 110.2  | 47.1  | 65.5   | 32.0  | 187.1  | 25.4  | 211.1  | 63.9  | 197.9  | 83.3  |
| IMP                        | 41.6   | 11.0  | 40.6   | 23.4  | 58.8   | 41.1  | 196.1  | 112.5 | 117.8  | 29.4  | 133.0  | 71.3  |
| Inosine                    | 122.2  | 70.6  | 95.1   | 160.2 | 144.9  | 106.8 | 210.6  | 56.9  | 148.5  | 36.3  | 202.1  | 96.7  |
| Isocitric acid             | NA     | NA    | NA     | NA    | NA     | NA    | NA     | NA    | NA     | NA    | NA     | NA    |
|                            | 15596. | 3334. | 15570. | 4744. | 17045. | 5070. | 14077. | 3159. | 11091. | 1770. | 16531. | 4827. |
| Lactic acid                | 9      | 7     | 5      | 1     | 4      | 6     | 6      | 0     | 2      | 4     | 4      | 8     |
| Leu                        | 119.8  | 14.7  | 183.7  | 63.6  | 166.7  | 26.3  | 346.7  | 41.2  | 396.1  | 106.7 | 407.1  | 104.3 |
| Lys                        | 429.5  | 26.7  | 381.2  | 89.7  | 409.4  | 90.3  | 845.5  | 130.4 | 564.2  | 66.0  | 737.5  | 93.6  |
| Malic acid                 | 704.1  | 160.5 | 770.2  | 281.2 | 785.7  | 390.4 | 254.2  | 181.9 | 1507.4 | 774.8 | 860.0  | 469.7 |
| Malonyl CoA                | 0.3    | 0.0   | 0.3    | 0.0   | 0.3    | 0.0   | NA     | NA    | NA     | NA    | NA     | NA    |
| Met                        | 56.5   | 8.4   | 74.3   | 12.2  | 116.2  | 21.1  | 77.1   | 9.4   | 73.4   | 22.7  | 95.3   | 12.8  |
| Mevalonic acid             | NA     | NA    | NA     | NA    | NA     | NA    | NA     | NA    | NA     | NA    | NA     | NA    |
| N,N-dimethylglycine        | NA     | NA    | 3.0    | 2.6   | 0.2    | 0.0   | 33.3   | 6.8   | 34.3   | 20.5  | 34.1   | 11.1  |
| N-acetylglutamic acid      | 1.3    | NA    | 1.6    | 0.2   | 2.7    | 0.5   | 47.0   | 20.2  | 70.9   | 18.2  | 71.7   | 43.6  |
| NAD+                       | 625.9  | 132.4 | 643.2  | 32.7  | 667.8  | 78.2  | 654.3  | 103.1 | 464.9  | 113.1 | 571.2  | 56.9  |
| NADH                       | 20.5   | 11.3  | 24.0   | 8.5   | 20.8   | 11.6  | 8.3    | 1.3   | 11.9   | 0.8   | 9.6    | 1.2   |
| NADP+                      | 28.2   | 10.7  | 30.1   | 3.9   | 32.1   | 7.0   | 24.0   | 6.6   | 21.2   | 9.9   | 27.0   | 8.8   |
| NADPH                      | 4.9    | 0.9   | 5.6    | 2.2   | 5.0    | 1.1   | 4.1    | 0.4   | 4.3    | 0.8   | 4.6    | 0.8   |
| N-carbamoylaspartic acid   | 0.2    | 0.0   | 1.1    | 0.6   | 0.5    | 0.3   | 0.2    | 0.2   | 2.5    | 2.2   | 2.9    | 2.9   |
| Ornithine                  | 15.8   | 6.4   | 15.1   | 4.6   | 25.9   | 2.5   | 241.9  | 65.2  | 231.2  | 58.6  | 294.3  | 83.5  |
| Phe                        | 76.0   | 10.1  | 106.9  | 9.6   | 103.4  | 10.2  | 151.8  | 20.1  | 155.5  | 19.7  | 171.1  | 24.3  |
| Phosphocreatine            | 8.5    | 4.5   | 9.4    | 5.8   | 10.4   | 2.8   | 3.9    | 1.3   | 2.5    | 2.0   | 3.5    | 1.6   |
| Phosphoenolpyruvic acid    | 5.4    | 2.7   | 1.5    | 1.5   | 3.0    | 2.3   | 0.5    | 0.2   | 0.9    | 0.4   | 0.6    | NA    |
| Pro                        | NA     | NA    | 210.6  | 112.2 | 84.2   | 73.8  | 275.0  | 116.9 | 306.9  | 141.9 | 284.5  | 84.3  |
| PRPP                       | 2.0    | 0.7   | 7.4    | 7.3   | 2.3    | 1.1   | 0.8    | 0.2   | 0.9    | 0.4   | 1.1    | 0.6   |
| Putrescine                 | 1.2    | 0.3   | 8.0    | 3.7   | 4.2    | 1.4   | 2.3    | 1.1   | 21.6   | 14.4  | 5.7    | 3.5   |
| Pyruvic acid               | 33.0   | 17.0  | 21.4   | 5.3   | 33.7   | 11.4  | 106.1  | 30.0  | 105.5  | 40.2  | 134.2  | 18.4  |
| Ribose 1-phosphate         | 31.4   | 7.8   | 36.1   | 27.4  | 46.9   | 24.1  | 147.7  | 24.6  | 89.0   | 40.2  | 106.5  | 32.6  |
| Ribose 5-phosphate         | 7.5    | 2.3   | 5.7    | 1.3   | 6.0    | 1.5   | 22.5   | 6.6   | 22.9   | 6.0   | 22.2   | 3.2   |
| Ribulose 5-phosphate       | 5.2    | 1.7   | 5.1    | 2.2   | 4.7    | 1.1   | 4.7    | 1.4   | 4.3    | 0.6   | 6.9    | 2.3   |



|                           |        |       |        |       |        |       |        |       |        |       |        |       |
|---------------------------|--------|-------|--------|-------|--------|-------|--------|-------|--------|-------|--------|-------|
| S-adenosylhomocysteine    | 0.8    | 0.0   | 0.9    | NA    | 0.8    | 0.2   | 37.7   | 12.8  | 27.8   | 9.2   | 37.8   | 16.9  |
| S-adenosylmethionine      | 20.5   | 1.3   | 21.9   | 2.9   | 21.2   | 2.4   | 46.4   | 9.4   | 45.2   | 20.5  | 65.9   | 3.1   |
| Sarcosine                 | NA     | NA    | NA     | NA    | NA     | NA    | 30.1   | 20.4  | 48.0   | 33.6  | 46.6   | 31.6  |
| Sedoheptulose 7-phosphate | NA     | NA    | NA     | NA    | NA     | NA    | 140.1  | 59.7  | 78.4   | 56.9  | 94.3   | 40.2  |
| Ser                       | 282.1  | 50.5  | 469.9  | 238.0 | 496.3  | 104.7 | 213.8  | 41.4  | 572.7  | 240.7 | 479.0  | 178.3 |
| Spermidine                | 28.4   | 7.0   | 37.1   | 11.1  | 35.5   | 10.0  | 49.7   | 11.6  | 50.7   | 14.3  | 42.2   | 4.6   |
| Spermine                  | 38.7   | 15.6  | 26.9   | 6.2   | 35.1   | 9.6   | 7.7    | 2.1   | 6.1    | 2.6   | 5.8    | 1.5   |
| Succinic acid             | 1071.1 | 280.0 | 731.5  | 414.0 | 722.8  | 405.0 | 828.9  | 400.0 | 946.0  | 336.0 | 946.9  | 254.2 |
| Thr                       | 319.2  | 25.5  | 429.3  | 56.6  | 493.3  | 28.9  | 299.6  | 62.7  | 535.5  | 150.0 | 522.1  | 112.2 |
| Trp                       | 37.5   | 12.4  | 41.6   | 19.0  | 37.7   | 11.1  | 54.7   | 10.2  | 50.7   | 13.1  | 54.9   | 13.3  |
| Tyr                       | 71.0   | 17.7  | 95.4   | 50.6  | 107.4  | 11.0  | 113.8  | 23.2  | 121.1  | 43.8  | 141.7  | 31.6  |
| UDP-glucose               | 24.6   | 6.1   | 24.1   | 7.2   | 26.5   | 4.8   | 150.0  | 94.7  | 223.8  | 97.2  | 207.3  | 62.7  |
|                           |        | 1276. |        |       |        | 1544. |        | 1171. |        |       |        | 1573. |
| Urea                      | 5689.4 | 8     | 6674.8 | 941.2 | 6341.3 | 4     | 5128.6 | 5     | 6283.3 | 757.9 | 6098.6 | 9     |
| Uric acid                 | 43.1   | 30.4  | 26.2   | 12.4  | 28.9   | 14.0  | 22.0   | 17.6  | 21.5   | 19.1  | 21.5   | 11.5  |
| Val                       | 118.8  | 17.6  | 178.6  | 47.9  | 137.5  | 37.5  | 359.1  | 54.2  | 388.4  | 106.8 | 367.0  | 144.2 |
| Xanthine                  | 20.3   | 15.3  | 18.4   | 28.2  | 17.7   | 10.4  | 42.3   | 28.8  | 72.6   | 89.1  | 57.3   | 37.9  |
| XMP                       | 0.1    | 0.0   | 0.1    | 0.0   | 0.1    | 0.1   | 0.1    | 0.0   | 0.2    | 0.2   | 0.0    | 0.0   |
| Xylulose 5-phosphate      | NA     | NA    | 3.6    | NA    | NA     | NA    | 3.7    | 2.8   | 2.4    | NA    | 4.2    | NA    |
| β-Ala                     | 3.9    | 4.1   | 7.4    | 4.5   | 6.6    | 3.1   | 227.4  | 149.6 | 311.8  | 202.0 | 255.3  | 90.6  |
| γ-aminobutyric acid       | 15.4   | 3.3   | 7.7    | 9.2   | 13.7   | 12.2  | 25.0   | 5.4   | 35.1   | 16.2  | 38.4   | 15.6  |

Quantitation of 116 metabolites by capillary electrophoresis-mass spectrometry (CE-TOMFS and CE-QqQMS) in heart and liver tissue at P150. NA = not available.

**Appendix Table S3. List of primary and secondary antibodies used in this study.**

| Experiment | Antibody                                            | Catalog     | Species | Vendor                      |
|------------|-----------------------------------------------------|-------------|---------|-----------------------------|
| IHC        | glial fibrillary acidic protein (GFAP)              | Z0334       | rabbit  | DAKO                        |
| IHC        | 4-hydroxynonenal                                    | ab46545     | rabbit  | Abcam                       |
| IHC        | Ki67                                                | ab16667     | rabbit  | Abcam                       |
| WB         | total OXPHOS antibody cocktail                      | MS603       | mouse   | Abcam                       |
| BNGE/WB    | UQCRFS1 (cIII subunit RISP)                         | ab14746     | mouse   | Abcam                       |
| WB         | voltage-gated ion channel 1 (VDACV1)                | ab154856    | rabbit  | Abcam                       |
| WB         | alternative oxidase (AOX)                           | custom-made | rabbit  | 21st Century Biochemicals   |
| WB         | NDUFA9 (cI subunit)                                 | ab14713     | mouse   | Abcam                       |
| WB         | SDHB (cII subunit)                                  | ab14714     | mouse   | Abcam                       |
| BNGE/WB    | ubiquinol cytochrome C reductase core protein I     | ab110252    | mouse   | Abcam                       |
| WB         | MT-CO1 (cIV subunit)                                | a14705      | mouse   | Abcam                       |
| WB         | ATP synthase F1 subunit alpha (ATP5A)               | ab14748     | mouse   | Abcam                       |
| BNGE/WB    | anti-rabbit IgG, HRP-linked                         | 7074        | goat    | Cell Signaling Technologies |
| BNGE/WB    | anti-mouse IgG, HRP-linked                          | 7076        | goat    | Cell Signaling Technologies |
| WB         | dinitrophenol                                       | ab178020    | rabbit  | Abcam                       |
| WB         | nitric oxide synthase 1 (NOS1)                      | sc-5302     | mouse   | Santa Cruz                  |
| WB         | nitrotyrosine                                       | 9691        | mouse   | Cell Signaling Technologies |
| WB         | phospho-phospholamban (Ser16/Thr17)                 | 8496        | mouse   | Cell Signaling Technologies |
| WB         | phospholamban                                       | 14562       | rabbit  | Cell Signaling Technologies |
| BNGE       | electron transfer flavoprotein subunit alpha (ETFa) | ab110316    | mouse   | Abcam                       |

UQCRFS1: ubiquinol-cytochrome C reductase, Rieske iron-sulfur polypeptide 1; NDUFA9: NADH:ubiquinone oxidoreductase subunit A9; SDHB: succinate dehydrogenase complex iron-sulfur subunit B; MT-CO1: mitochondrially-encoded cytochrome C oxidase I; IgG: immunoglobulin G
