# Supplementary material for: Alternative oxidase‐mediated respiration prevents lethal mitochondrial cardiomyopathy
Source: PubMed Central journal article supplement (PMC6328925; doi:10.15252/emmm.201809456), 2018-12-10

Fig 6A. Blue native PAGE

Heart

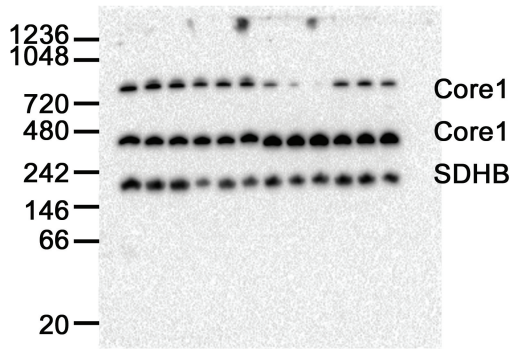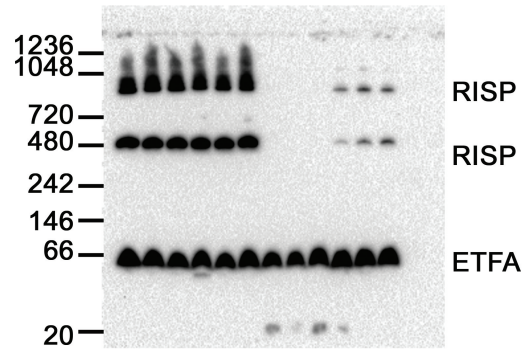

Kidney

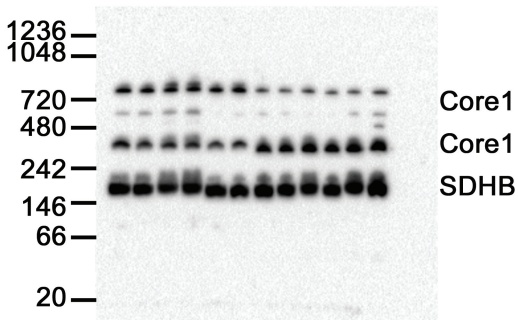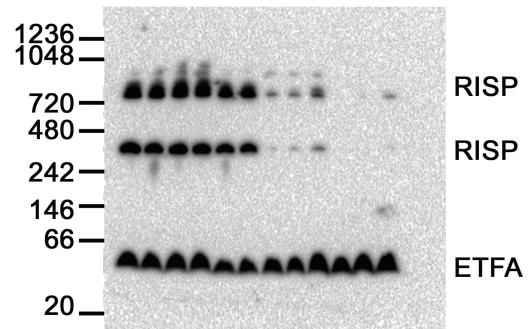

Liver

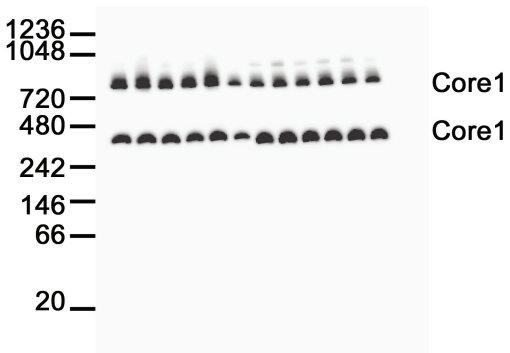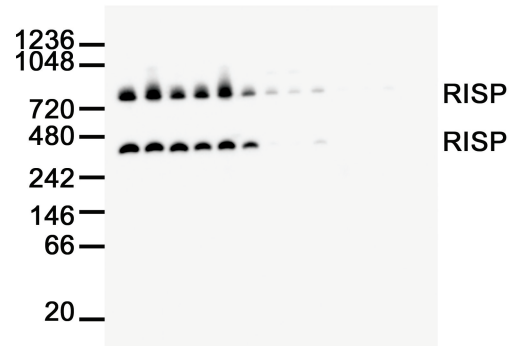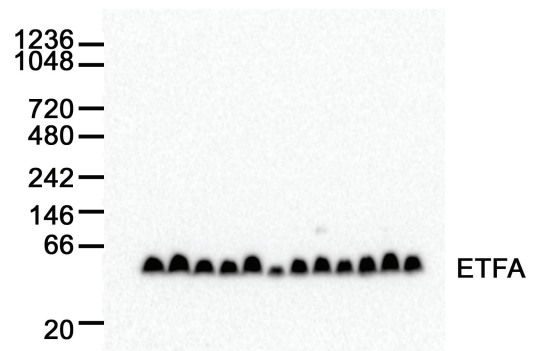

Supplement: EMMM-11-e9456-s003.pdf [file EMMM-11-e9456-s003.pdf]
