# Supplementary material for: Alternative oxidase‐mediated respiration prevents lethal mitochondrial cardiomyopathy
Source: PubMed Central journal article supplement (PMC6328925; doi:10.15252/emmm.201809456), 2018-12-10

Fig 8G. NOS1 antibody

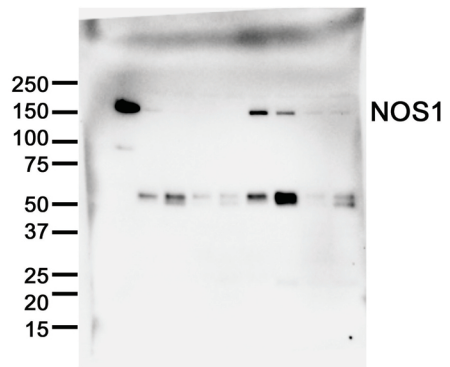

Supplement: EMMM-11-e9456-s004.pdf [file EMMM-11-e9456-s004.pdf]
