# Supplementary material for: Alternative oxidase‐mediated respiration prevents lethal mitochondrial cardiomyopathy
Source: PubMed Central journal article supplement (PMC6328925; doi:10.15252/emmm.201809456), 2018-12-10

Fig EV3I. Representative Western blots

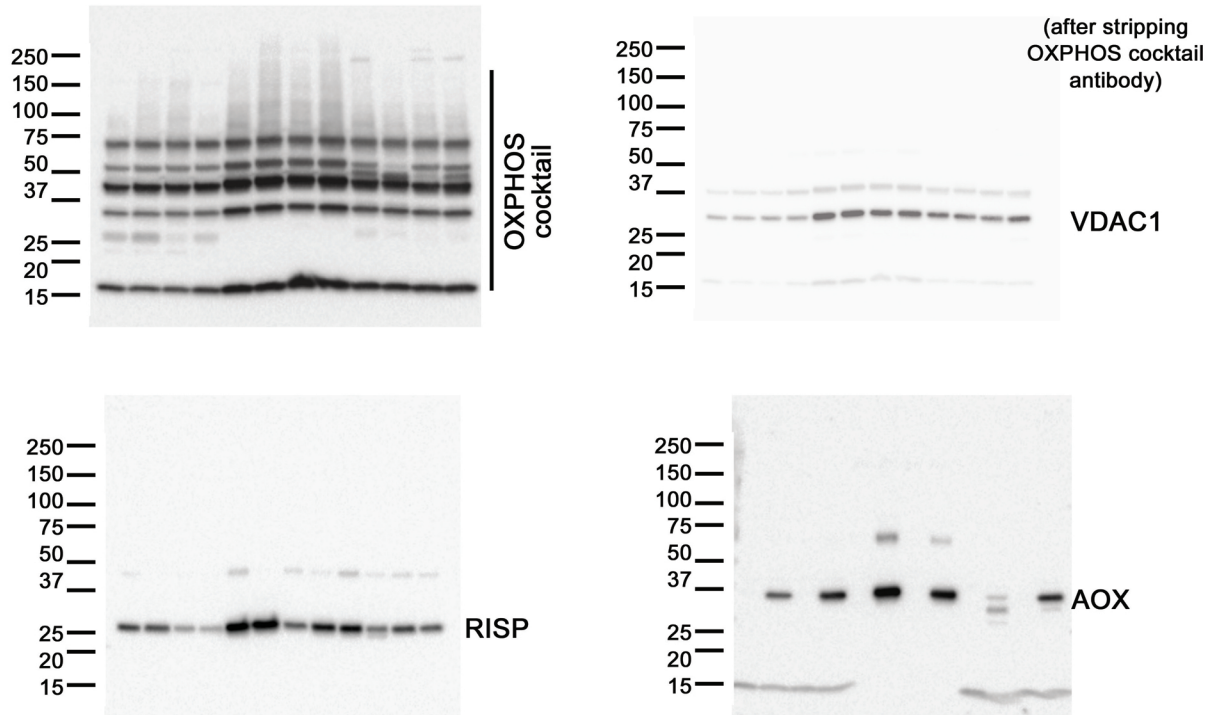

Supplement: EMMM-11-e9456-s005.pdf [file EMMM-11-e9456-s005.pdf]
